# Supplementary material for: Graphene–bacteria composite for oxygen reduction and lithium ion batteries
Source: Royal Society of Chemistry journal article supplement (doi:10.1039/c5ta01987g), 2015-01-01
Supplement: c5ta01987g1.pdf [file c5ta01987g1.pdf]

## Electronic Supplementary Information

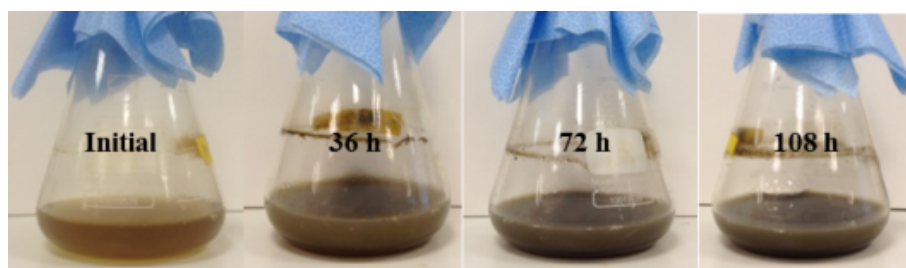

Fig. S1 Optical photographs of GO-bacteria mixture in culture medium at different cultivation time.

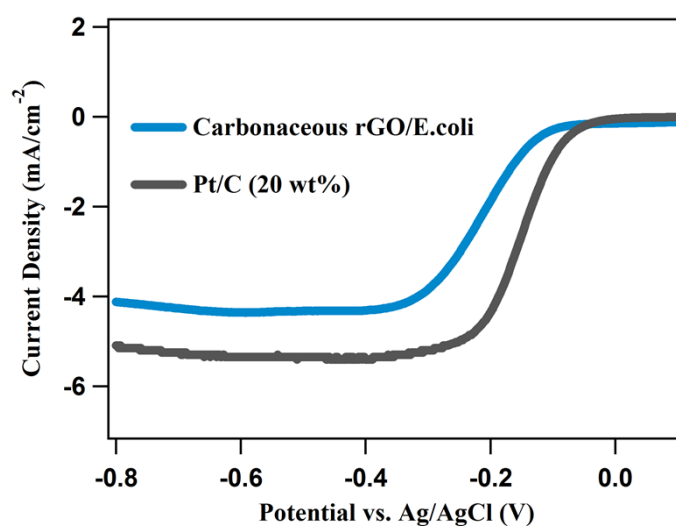

Fig. S2 LSV of carbonaceous rGO/ *E. coli* and commercial Pt/C (20 wt%) at roatation speed of 1600 rpm

### Derivation of electron transfer number

The electron transfer number ( $n$ ) of ORR is determined based on K-L equation: <sup>1,2</sup>

$$1/I = 1/I_L + 1/I_K = 1/(B\omega^{1/2}) + 1/I_K$$

$$B=0.2nF(D_0)^{2/3}\nu^{-1/6}$$

Where  $I$ ,  $I_L$  and  $I_K$  are the measured current density, diffusion limiting current density and kinetic-limiting current density, respectively;  $\omega$  is the rotation speed in rpm;  $F$  is the Faraday constant (96485 C mol<sup>-1</sup>);  $D_0$  is the diffusion coefficient of oxygen in 0.1 M KOH ( $1.9 \times 10^{-5}$  cm<sup>2</sup> s<sup>-1</sup>);  $\nu$  is the kinetic viscosity (0.01 cm<sup>2</sup> s<sup>-1</sup>); and  $C_0$  is the bulk concentration of oxygen in the solution ( $1.2 \times 10^{-6}$  mol cm<sup>-3</sup>).

## Tafel Plot

For the Tafel plot, kinetic-limiting current density ( $I_K$ ) is calculated based on mass-transport correction:  $I_K = I \times I_L / (I_L - I)$ . And the Tafel equation is given as  $\eta = a + b \log I_k$ , where  $\eta$  is the measured potential vs. Ag/AgCl.

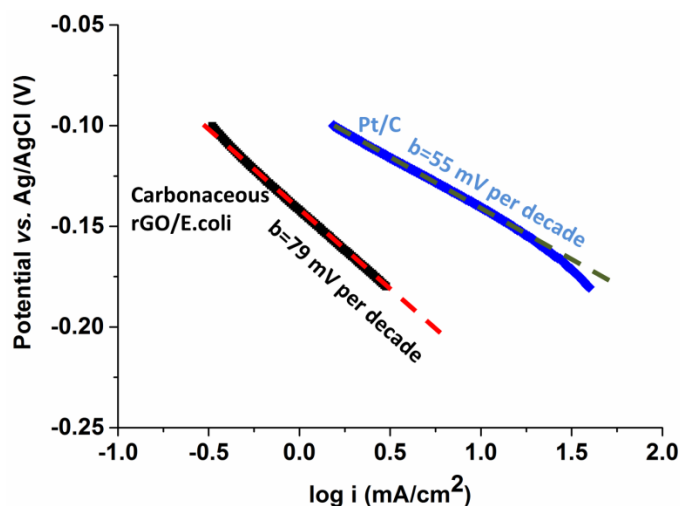

Fig. S3 Tafel plots of carbonaceous rGO/*E.coli* and Pt/C obtained at low currents and 1600 rpm, in 0.1 M KOH.

As shown in Figure S3, the Tafel slopes of carbonaceous graphene/*E.coli* and Pt /C are 79 and 55 mV per decade, respectively. Both values are comparable to the ideal theoretical value of 60 mV per decade for ORR catalyzed by Pt at room temperature.<sup>3,4</sup>

## References

1. I. Y. Jeon, H. J. Choi, S. M. Jung, J. M. Seo, M. J. Kim, L. M. Dai and J. B. Baek, *J Am Chem Soc*, 2013, **135**, 1386-1393.
2. F. X. Ma, J. Wang, F. B. Wang and X. H. Xia, *Chem Commun*, 2015, **51**, 1198-1201.
3. Y. G. Li, W. Zhou, H. L. Wang, L. M. Xie, Y. Y. Liang, F. Wei, J. C. Idrobo, S. J. Pennycook and H. J. Dai, *Nat Nanotechnol*, 2012, **7**, 394-400.
4. Y. Y. Liang, Y. G. Li, H. L. Wang, J. G. Zhou, J. Wang, T. Regier and H. J. Dai, *Nat Mater*, 2011, **10**, 780-786.
